# Supplementary material
Source: Springer Nature journal article supplement (https://www.springermedizin.de/resource/supplementary/12957_2011_1018_MOESM1_ESM.pdf/9561586)

# Survival Functions

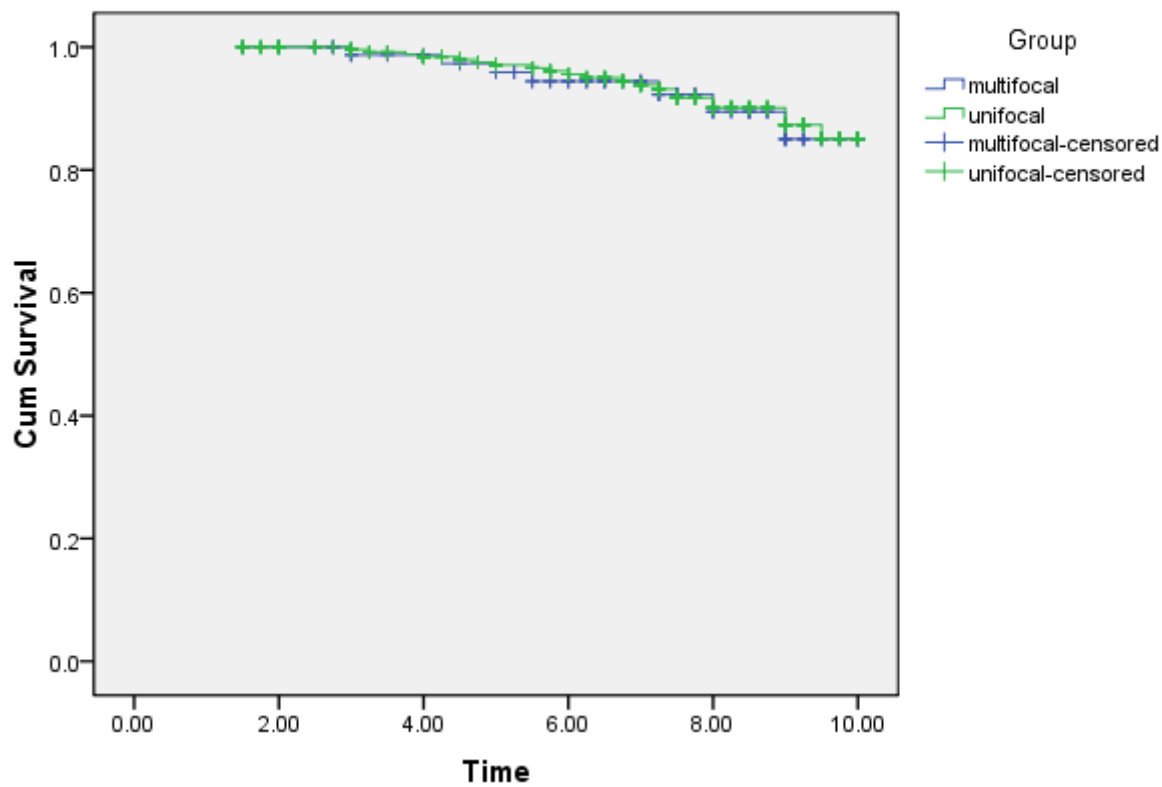

Supplement: MOESM1 [file 9561586]
